## 14 **Abstract**

15

16 The yeast *Komagataella phaffii* is widely used as a microbial host for heterologous  
17 protein production. However, molecular tools for this yeast are basically restricted to a  
18 few integrative and replicative plasmids. Four sequences that have recently been  
19 proposed as the *K. phaffii* centromeres could be used to develop a new class of  
20 mitotically stable vectors. In this work we designed a color-based genetic assay to  
21 investigate genetic stability in *K. phaffii*. Plasmids bearing each centromere and the  
22 *ADE3* marker were evaluated in terms of mitotic stability in an *ade2/ade3* auxotrophic  
23 strain which allows plasmid screening through colony color. Plasmid copy number was  
24 verified through qPCR. Our results confirmed that the centromeric plasmids were  
25 maintained at low copy number as a result of typical chromosome-like segregation  
26 during cell division. These features, combined with high transformation efficiency and  
27 *in vivo* assembly possibilities, prompt these plasmids as a new addition to the *K. phaffii*  
28 genetic toolbox.

29

## 30 **Author summary**

31 The methylotrophic yeast *Komagataella phaffii* is considered as one of the most  
32 important platforms for the production of proteins and metabolites. We sought in this  
33 study to develop a color-based genetic system widely used in other yeasts to assess  
34 mitotically stability of vectors carrying the proposed *K. phaffii* centromeres. First, we  
35 constructed a *K. phaffii* strain (LA3) mutant for *ADE2* and *ADE3*; this resulted in a  
36 strain that forms white colonies and when transformed with a vector (pPICH-ADE3)

37 carrying *ADE3* turns red. Next, the four *K. phaffii* centromeres were cloned into pPICH-  
38 *ADE3* and tested in LA3 for copy number and plasmid stability. Centromeres are  
39 responsible for proper chromosome segregation during cell division, hence guaranteeing  
40 that both daughter cells receive one copy of the duplicated DNA. Our results show that  
41 three *K. phaffii* centromeres behaved as expected conferring extra stability to the  
42 replicative plasmids and maintaining them at low copy number. Once characterized,  
43 centromeres can be used as parts in the construction of advanced genetic manipulation  
44 tools, thus allowing the construction of strains capable of expressing large metabolic  
45 pathways for the production of complex biochemicals.

46

## 47 **Introduction**

48

49 *Komagataella phaffii* is a methylotrophic yeast of great industrial importance  
50 which has been used for more than 30 years as a heterologous protein production  
51 platform [1]. Its genome was first published in 2009 and has since then been refined and  
52 thoroughly studied [2,3]. As a result, in addition to a protein factory, *K. phaffii* has also  
53 been widely considered as a platform for the production of chemicals,  
54 biopharmaceuticals, vitamins and other molecules. However, the construction and  
55 regulation of new pathways demand complex molecular biology tools which are not  
56 readily available for this yeast [4].

57 *K. phaffii* genetic manipulation traditionally involves the use of shuttle vectors  
58 assembled in *Escherichia coli* and subsequently integrated into the yeast's genome [5].  
59 Recent studies have described the development of a wide range of genetic parts for use  
60 in this yeast, as well as new methods of plasmid assembly and transformation [6]. An

61 alternative to integrative strategies is the use of replicative plasmids, which are usually  
62 based on the well-known ARS1 sequence [1]. These plasmids may overcome some  
63 drawbacks such as genetic instability in multi-copy strains and non-specific integration  
64 [7,8]. In addition, they present higher transformation efficiency when compared to  
65 integrative vectors and can be assembled by *in vivo* recombination, which eliminates the  
66 need for bacterial transformation [9,10]. However, replicative plasmids show low  
67 mitotic stability when compared to integrative vectors and few vector options are  
68 available for use [11]. Stability problems can be circumvented by the creation of  
69 centromeric plasmids, which may provide proper segregation during mitosis. A greater  
70 mitotic stability as well as low copy number allow stable and constant protein  
71 expression [12]. Centromeric plasmids can be constructed *in vivo*, allowing the  
72 assembly and cloning of large sequences including whole metabolic pathways and  
73 regulatory regions [13]. Therefore, the construction of such vectors would be of great  
74 value for *K. phaffii* strain development in the context of synthetic biology.

75       Centromeres are typically surrounded by large heterochromatin sections in most  
76 organisms [14]. Their structure ranges from simple “point” centromeres of only ~125 bp  
77 in *Saccharomyces cerevisiae* to epigenetic, sequence-independent centromeres, such as  
78 those present in plants and animals. The reason for this phenomenon is that, for most  
79 eukaryotes, centromeres are maintained epigenetically and not genetically. Sequence  
80 homologies are rare in and between species, hampering the definition of a consensus  
81 sequence. In addition, some DNA regions can be centromeric or not depending on its  
82 function in previous cell cycles, which highlights the epigenetic nature of the  
83 centromere [15].

84 As for non-conventional yeasts there are wide variations in centromere size and  
85 structure. *Candida glabrata* has centromeres that show some homology to the CDEI and  
86 CDEIII regions of *S. cerevisiae* while *Kuraishia capsulata* centromeres have 200-bp  
87 conserved sequences [16,17]. On the other hand, *Candida tropicalis*,  
88 *Schizosaccharomyces pombe* and *Candida albicans* have regional centromeres named  
89 after their sizes which range from 3 to 110 kb [18–20].

90 *K. phaffii* centromeres have recently been identified, bearing no sequence  
91 similarities to those of any other yeast [3]. Since centromere function relies strongly on  
92 its structure rather than on its sequence, a centromere-specific histone H3 variant  
93 (CSE4) was used in the search for centromeric regions in *K. phaffii*. A CSE4 homolog  
94 was identified in chromosome 2 and tagged with a fluorescence marker. The  
95 corresponding nuclear localization of the histone-DNA complex indicated a centromere  
96 pattern typical of budding yeasts [3]. Tridimensional conformation analysis followed  
97 the centromere clustering pattern observed in yeasts and narrowed down all four *K.*  
98 *phaffii* centromere locations to 20 kb windows [21].

99 Considering that a low transcription rate is typical of centromeric regions, RNA-  
100 seq analysis allowed to pinpoint the putative centromeric locations for all four *K. phaffii*  
101 centromeres [3]. Similarly to *C. tropicalis* and *S. pombe*, *K. phaffii* centromeres are  
102 formed by inverted repeats. All four sequences have two inverted repeats of ~2,5 kb,  
103 separated by a central segment of 800 to 1300 bp. Chromatin immunoprecipitation  
104 sequencing analysis showed that the CSE4 histone binds preferably to the central  
105 region, but also along the inverted repeats [22].

106 *K. phaffii* centromeric sequences contain early replication peaks with  
107 autonomously replicating sequences, characteristics that are also observed in

108 centromeres of other yeasts [23,24]. According to recently published studies, there are  
109 native ARS sequences contained within centromeres 2, 3 and 4. These comprise regions  
110 within the inverted repeats, as well as unique adjacent sequences [22,25].

111 In order to expand the functional analysis of the *K. phaffii* centromeres we  
112 sought in this study to develop a genetic system based on an *ade2/ade3* auxotrophic  
113 strain and a replicative vector carrying the wild-type *ADE3*. Vectors carrying each  
114 individual centromere were used to assess plasmid copy number and mitotic stability.

115

## 116 **Results and Discussion**

117

118 In yeasts, adenine synthesis pathway is used as a tool for auxotrophic selection,  
119 gene copy number indicator and for plasmid stability analysis [26]. Many genes from  
120 this pathway have been deleted in *S. cerevisiae* in order to create auxotrophic strains,  
121 while in *K. phaffii* studies have only focused on *ADE1* and *ADE2* [27,28]. *K. phaffii*  
122 LA2, a strain mutant for *ADE2* [29], was used as a starting point for the construction of  
123 a strain that would allow plasmid stability verification. Deletion of *ADE2* results in cells  
124 auxotrophic for adenine which accumulate a red pigment [26] while deletion of genes  
125 located upstream, such as *ADE1* or *ADE3*, should prevent the formation of such  
126 pigment [27]. As expected, the deletion of *ADE3* in LA3 strain results in white colonies  
127 (Fig 1). Deletion of *ADE3* in *S. cerevisiae* has regulatory effects in the histidine  
128 synthesis pathway [30]. Consequently, *ade2 ade3* strains are not only auxotrophic for  
129 adenine, but also for histidine. In order to verify if this phenotype is applicable to *K.*  
130 *phaffii*, we plated strains X-33, LA2 and LA3 on MD medium without supplementation,  
131 comparing growth and colony color to cells plated on MD medium with adenine and

132 histidine (Fig 1). LA3 strain displayed the expected histidine auxotrophy phenotype,  
133 showing that the adenine-histidine pathways in *K. phaffii* and *S. cerevisiae* have  
134 common characteristics.

135

136 **Fig 1. Strain phenotypic analysis on defined media.** *K. phaffii* X-33 (wild-type), LA2  
137 and LA3 cultures were spotted on MD medium with or without supplementation.

138

139 In order to assess plasmid stability, we first constructed plasmid pPICH-ADE3  
140 bearing the *ADE3* gene (Fig 2). When transformed with pPICH-ADE3, LA3 cells  
141 should return to being red and any changes on colony color would allow a simple  
142 screening of plasmid loss [26]. Although adenine auxotrophy has been explored for  
143 other purposes in *K. phaffii* [28], this particular color-based system has not yet been  
144 used for measuring plasmid stability in this yeast.

145

146 **Fig 2. Map of vector pPICH-ADE3.** ARS1 is an autonomously replicative sequence  
147 and *Sh ble* is the zeocin resistance marker. The *NotI* site was used for cloning *K. phaffii*  
148 *ADE3* gene.

149

150 pPICH-ADE3 was used for cloning all four *K. phaffii* centromeres. Since it  
151 revealed extremely difficult to amplify entire centromeric regions we designed a  
152 strategy to amplify centromeres in halves in order to reduce fragment size and to avoid  
153 primer annealing inside the inverted repeats (Fig 3). Amplified fragments exhibited in  
154 their ends overlapping regions that would allow recombination between each other and  
155 with vector pPICH-ADE3. Centromeric primer sequences were designed using *K.*

156 *phaffii* GS115 genome sequence as reference [2]. The amplified regions corresponded to  
157 the following chromosomal coordinates: chromosome 1 position 1401429-1406917  
158 (5488 bp); chromosome 2 position 1543739-1550657 (6918 bp); chromosome 3  
159 position 2204800-2211493 (6693 bp) and chromosome 4 position 1703369-1709958  
160 (6589 bp).

161

162 **Fig 3. Strategy for amplification of *K. phaffii* centromeres.** Schematic representation  
163 of a typical *K. phaffii* centromere. Inverted repeats are represented by green arrows.  
164 Primer annealing regions are shown by small arrows.

165

166 Centromeric sequences are known as early replication regions and according to  
167 recently published studies there are native ARS sequences contained within centromeres  
168 2, 3 and 4 [11, 22]. Fig 4 shows the relative positions of the ARS sequences within and  
169 around the *K. phaffii* centromeres. In chromosome 2, ARS are located on coordinates  
170 1543374-1543971 (597 bp) and 1549967-1551156 (1189 bp). These sequences were  
171 partially amplified in this work, containing 232 and 690 bp, respectively. As for  
172 chromosome 3, there is an ARS located on coordinates 2204369-2205185 (816 bp)  
173 which was also partially amplified (385 bp). Chromosome 4 has an ARS on coordinates  
174 1703466-1704103 (637 bp) which was fully amplified, as well as a partially amplified  
175 ARS (840 bp) located on coordinates 1709118-1710114.

176

177 **Fig 4. Relative positions of ARS sequences around centromeres 2, 3 and 4 of *K.***  
178 ***phaffii*.** Regions in gray represent centromeric sequences amplified in this work. Open  
179 rectangles indicate the relative positions of identified ARS sequences [11].



180

181 LA3 strain was individually transformed with pPICH-ADE3 and all four  
182 centromeric plasmids (pPICH-CEN1-4). Plasmids pPICH-CEN1, 2 and 4 were verified  
183 for autonomous replication by plasmid rescue in *E. coli*, while the circular structure of  
184 pPICH-CEN3 was confirmed through a set of overlapping PCRs since CEN3 was the  
185 only centromere that could not be cloned directly in bacteria.

186 Plasmid stability was firstly verified through colony color in non-selective  
187 medium (Fig 5). When plated on YPD non-selective medium, colonies transformed with  
188 pPICH-ADE3 lost their color rapidly and presented a red center with large white edges,  
189 a result consistent with plasmid instability. In contrast, strains transformed with all  
190 centromeric plasmids presented a uniform red coloration throughout the colony.

191

192 **Fig 5. Plasmid stability analysis.** LA3 strain transformed with pPICH-ADE3 and the  
193 four centromeric plasmids was grown on YPD medium for 3 days until color  
194 development.

195

196 Further stability examination of the centromeric plasmids was performed by  
197 growing cells in liquid YPD medium for 144 hours. After diluting and plating cultures  
198 on non-selective medium, red and white colonies were counted and compared between  
199 each construction (Fig 6). LA3 strain transformed with pPICH-ADE3 did not yield red  
200 colonies in any growth period, indicating that the plasmid was mitotically unstable.  
201 Conversely, centromeric plasmids presented a higher mitotic stability than pPICH-  
202 ADE3. After 96 hours of growth, cells with pPICH-CEN1 started to present white  
203 colonies, while all other centromeric plasmids remained stable. After 144 hours,

204 pPICH-CEN1 was lost in most colonies while the other centromeric plasmids were lost  
205 in <10% cells. The reason for the instability of pPICH-CEN1 could be related to the  
206 absence of an autonomously replicating sequence within the centromere, since all other  
207 centromeres were cloned with at least a partially amplified ARS. The original  
208 replicating sequence in the pPICH-ADE3 plasmid, ARS1, has shown to be less efficient  
209 than its modern counterparts, therefore new ARS contained in the centromeres could  
210 have enhanced the mitotic stability of the centromeric plasmids [11].

211

212 **Fig 6. Plasmid stability test.** (A) Aliquots of the liquid cultures were collected at after  
213 96 and 144 hours of growth and plated on YPD medium. Red colonies represent cells  
214 that maintained the *ADE3*-containing plasmid, while white colonies have lost it. Red  
215 portions of the bars represent red colonies; light pink bars represent white colonies. (B)  
216 A plate representing a typical result after 144 h growth.

217

218 Yeast centromeric plasmids knowingly have a higher mitotic stability under non-  
219 selective conditions than common replicative vectors since they are equally segregated  
220 between daughter cells and therefore provide a uniform culture of cells containing the  
221 plasmid [26]. A centromeric vector containing *K. phaffii* CEN2 has been constructed  
222 and it presented an enhanced stability when compared to a replicative plasmid [25]. In  
223 addition to *K. phaffii* and *S. cerevisiae*, centromeric plasmids have been developed for  
224 other yeasts such as *S. pombe*, *C. glabrata* and *Scheffersomyces stipitis* and in all cases  
225 enhanced plasmid stability under non-selective conditions was verified [12,17].

226 Yeast replicative plasmids are normally replicated but are unevenly distributed  
227 between daughter cells, which creates both multi-copy and plasmidless cells [26]. Under

228 selective conditions, cells lacking the plasmid are unable to survive and the result is a  
229 population of multi-copy plasmid-containing cells. The construction of centromeric  
230 plasmids should provide better plasmid segregation and stability and cells should  
231 maintain a low and stable plasmid copy number during yeast growth [31]. Plasmid copy  
232 number was assessed by qPCR after strains were grown in YPD medium containing  
233 zeocin in order to ensure that all cells assayed were harboring the centromeric plasmids.  
234 The results were compared to LA3 strain transformed with pPICH-ADE3 also grown in  
235 selective medium and to the LA3 control strain, grown in YPD medium. Results from  
236 qPCR (Fig 7) indicate that the strain transformed with centromeric plasmids carried 1-2  
237 copies per cell while the replicative plasmid was present at approximately 25 copies per  
238 cell. The difference between plasmid copy number for the replicative vector and all  
239 centromeric vectors was significant according to a t-test ( $p < 0.05$ ). This result illustrates  
240 the expected segregation pattern described above for growth in selective conditions and,  
241 together with the mitotic stability analysis, provides a clear picture of *K. phaffii* genetic  
242 manipulation using centromeric plasmids.

243

244 **Fig 7. Plasmid copy number determination.** The number of plasmids in each cell was  
245 estimated by qPCR. LA3 was used as negative control. Statistical analysis comparing  
246 each of the centromeric plasmids with the replicative vector was performed through a t-  
247 test using GraphPad Prism 5. ( $p < 0.05$ ). Error bars depict the standard deviation of the  
248 mean ( $n = 3$ ).

249

250 *S. cerevisiae* centromeric plasmids, in comparison to plasmids bearing the 2  $\mu$ m  
251 sequence, presented the same difference in copy number when auxotrophic markers  
252 were used. However, when the *kanMX* G418 resistance marker was used, plasmid copy  
253 number did not differ between centromeric and replicative plasmids [36]. This indicates  
254 that factors other than the type of replication origin can influence plasmid copy number.  
255 In a previous study, *K. phaffii* was transformed with replicative and integrative vectors  
256 bearing centromere 2 and, unlike our results, a low copy number of vector sequences  
257 was observed in both cases [25]. The reason for this discrepancy is unclear but it could  
258 be related to strain variation or plasmid constructions used since pPICH-CEN1-4  
259 contained the *ADE3* gene in addition to ARS1 and the zeocin-resistance marker.

260 Overall, our results indicate that centromeric plasmids could be employed as a  
261 new tool for genetic manipulation of *K. phaffii*. Plasmids were maintained for long  
262 periods in non-selective medium, indicating that growth can be performed without the  
263 addition of antibiotics or any form of selective pressure. The centromeric plasmids' low  
264 copy numbers per cell characterize a stable and homogeneous culture that can provide  
265 reliable expression results. Finally, their structure as a circular molecule allows *in vivo*  
266 plasmid assembly with relatively short homologous sequences when compared to  
267 genomic integration techniques where sequences have to be much longer for directed  
268 homologous recombination. Simpler assembly may also facilitate the construction of  
269 larger and more sophisticated vectors such as yeast artificial chromosomes (YAC)  
270 whose stability features may be also analysed by the color-based assay described in this  
271 work.

272

## 273 **Methods**

274

## 275 **Strains and Media**

276 DNA cloning was performed using chemically competent *Escherichia coli* XL-  
277 10 Gold (Agilent Technologies) grown in LB medium (5 g L<sup>-1</sup> yeast extract, 10 g L<sup>-1</sup>  
278 peptone and 10 g L<sup>-1</sup> NaCl, pH 7,2). When needed, agar was added to a final  
279 concentration of 1,5%. When zeocin (25 µg mL<sup>-1</sup>) was used for bacterial antibiotic  
280 selection, NaCl concentration was reduced to 5 g L<sup>-1</sup>.

281 *K. phaffii* strains were derived from X-33 (Invitrogen). LA2 strain (*amd2 ade2*)  
282 was described in a previous work<sup>29</sup>. Yeast was routinely grown in YPD medium (10 g  
283 L<sup>-1</sup> yeast extract, 20 g L<sup>-1</sup> peptone and 20 g L<sup>-1</sup> glucose). Solid medium used 2% agar.  
284 Zeocin and G418, when used, were added at 100 µg mL<sup>-1</sup> and 500 µg mL<sup>-1</sup>,  
285 respectively. Hygromycin B was used to a final concentration of 50 µg mL<sup>-1</sup>. Minimal  
286 medium (MD) used 0,34% Yeast Nitrogen Base, 1% (NH<sub>4</sub>)<sub>2</sub>SO<sub>4</sub>, 2% glucose,  
287 0,00004% biotin and 0,0002% adenine or 0,004% histidine, when needed.

288

## 289 **PCR**

290 DNA was amplified using Invitrogen Platinum Taq DNA Polymerase (High  
291 Fidelity), Promega GoTaq Colorless Master Mix or Sigma-Aldrich Accutaq LA DNA  
292 Polymerase. All primers used in this work are shown in Table 1.

293

294 **Table 1. Primers used in this work.**

| Primer   | Sequence                                                                        | Enzyme       |
|----------|---------------------------------------------------------------------------------|--------------|
| ADE3up-F | GATAAGCTTGATATCGAATTCCTGCAGCCCC <u>CCC</u><br><u>GGG</u> ACGTAATGGAATAACTGCTGAC | <i>Sma</i> I |

|           |                                                                        |              |
|-----------|------------------------------------------------------------------------|--------------|
| ADE3up-R  | GAAGTTATGGATCCTACGAGGTAATTGAAGGCT<br>CAC                               |              |
| ADE3lox-F | CTTCAATTACCTCGTAGGATCCATAACTTCGTAT<br>AATG                             |              |
| ADE3lox-R | CAATCTCTCCCTTGTCATCGGATCCATAACTTCG<br>TATAG                            |              |
| ADE3dw-F  | GAAGTTATGGATCCGATGACAAGGGAGAGATT<br>GAAG                               |              |
| ADE3dw-R  | GGTGGCGGCCGCTCTAGAACTAGTGGATCCCC<br><u>CCCGGGTGCAATGTACTGTTGAGTAGG</u> | <i>SmaI</i>  |
| ADE3conF  | GGGGACCGGAGGTA AAAAGAC                                                 |              |
| ADE3conR  | GTTGGAATAATTGCATGGTCTG                                                 |              |
| MUT1(Hpa) | CCATTGACATGGTAAACAGTTGGA                                               |              |
| MUT2(Bam) | GAACACTGGGATCTTGTTGAGG                                                 |              |
| Cen1-F    | GAGTTTAAAC <u>GGATCC</u> ACGAAGCAATGGATAG<br>GCACT                     | <i>BamHI</i> |
| Cen1-R    | CCGCGAATTC <u>GGATCC</u> TGAAGTCTTTCAGAGAG<br>GAGCA                    | <i>BamHI</i> |
| Cen1c-F   | CAAGTATGCGTGATCCCAGGT                                                  |              |
| Cen1c-R   | TACGAATTGTGGGGCTCTGT                                                   |              |
| Cen2-F    | GAGTTTAAAC <u>GGATCC</u> ATCTCCGTTGATACTCC<br>CAAC                     | <i>BamHI</i> |
| Cen2-R    | CCGCGAATTC <u>GGATCC</u> ATCGACAAGCAGAACA<br>CTAAG                     | <i>BamHI</i> |
| Cen2c-F   | GAATGGAGGTGCTGGTGGTTA                                                  |              |
| Cen2c-R   | TGTAATGCTCGCTGGTGAGT                                                   |              |
| Cen3-F    | GAGTTTAAAC <u>GGATCC</u> AAGTGGTACACCAGTCA<br>GCG                      | <i>BamHI</i> |
| Cen3-R    | CCGCGAATTC <u>GGATCC</u> TAGTATTCAACTGCAA<br>CTGC                      | <i>BamHI</i> |
| Cen3c-F   | TCAGCCGAATACCCACACTT                                                   |              |
| Cen3c-R   | TCAGCCGTCAGCGAAATGAT                                                   |              |
| Cen4-F    | GAGTTTAAAC <u>GGATCC</u> CAAACGCACCGTCTTGT<br>TCA                      | <i>BamHI</i> |
| Cen4-R    | CCGCGAATTC <u>GGATCC</u> AATTGATGTAGACGAGC<br>AGC                      | <i>BamHI</i> |

|          |                                                                                                                   |  |
|----------|-------------------------------------------------------------------------------------------------------------------|--|
| Cen4c-F  | TCAAGAATCGTACTGGCACCT                                                                                             |  |
| Cen4c-R  | CAAGCTCGTGAGATGGGATGT                                                                                             |  |
| Cen370-F | CGCTCAGTGGAACGAAAACACGTTAAGGGA<br>TTTGGTCATGAGATCAGATCTAACATCCAAAGA<br>CGAAAGGTTGAATGAGTTTAAACGGATCCAAGT<br>GG    |  |
| Cen370-R | GCTGGCCCTCTCTTCCCAGCTCACGAATCAGAT<br>CCTAAGTCCTACTCAACAGTACATTGCAGCGGC<br>CGCGTTTAAACGAATTTCGGATCCTCAGTATTCA<br>A |  |
| qZEO-F   | CGACGTGACCCTGTTCATCA                                                                                              |  |
| qZEO-R   | TGGACACGACCTCCGACCA                                                                                               |  |
| qHIS-F   | GTGTATCCTGGCTTGGCATCT                                                                                             |  |
| qHIS-R   | GCCAAGTACGGTGTGACGTT                                                                                              |  |

295 Restriction sites are underlined.

296

## 297 **DNA manipulation**

298 All basic DNA manipulation and analysis were performed as previously  
299 described [32]. Restriction digestion was performed in accordance to the manufacturer  
300 instructions (New England Biolabs), as well as vector dephosphorylation with Shrimp  
301 Alkaline Phosphatase (Promega) and ligation with T4 DNA ligase (USB). In-Fusion  
302 Cloning Kit (Clontech) was used for *in vitro* assembly of plasmids. Site-directed  
303 mutagenesis was performed using the Transformer Site-Directed Mutagenesis kit  
304 (Clontech). PCR and gel purification used Promega Wizard SV Gel and PCR Clean-Up  
305 System.

306

## 307 **Quantitative PCR (qPCR)**

308 Strains harboring the zeocin resistance plasmids were grown to an OD (optical  
309 density measured at 600nm) of 1 in 10 mL YPD containing zeocin while LA3 was  
310 grown in 10 mL YPD. Cells were collected by centrifugation at 2000 x g for 5 minutes.  
311 Cell pellet was resuspended with 1 mL 0,25% SDS and incubated at 98°C for 8 minutes  
312 according to a previous work [25]. Finally, cell debris was removed by centrifugation  
313 and DNA was diluted 10-fold in water before qPCR reactions.

314 Quantitative PCR reactions used primers qZEO-F and qZEO-R for plasmid  
315 quantification and qHIS-F and qHIS-R as an internal single-copy control. Assays were  
316 carried out with iTaq Universal SYBR Green Supermix (Bio-Rad) in a Rotor-Gene Q  
317 (Qiagen) thermal cycler. Analysis used the absolute quantification method and standard  
318 curves that ranged from  $1 \times 10^4$  to  $1 \times 10^8$  copies of the gene of interest. pPIC9  
319 (Invitrogen) and pPICH linearized plasmids were used for construction of the standard  
320 curves.

321

## 322 **Yeast transformation**

323 *K. phaffii* was electroporated following two different protocols. For integrative  
324 cassettes, we followed the *Pichia* Expression Kit protocol (Invitrogen) and when using  
325 replicative plasmids, we proceeded as described previously [33].

326

## 327 **Construction of an *ade2 ade3* strain for color-based stability**

### 328 **assays**

329 Strain LA2 [29] was transformed with an *ADE3* deletion cassette and had the  
330 marker recycled before moving on with the centromeric plasmid transformations.



331 Construction of the deletion cassette used PCR reactions assembled by an “In-Fusion”  
332 cloning reaction. Briefly, primers ADE3up-F and R; ADE3dw-F and R were used for  
333 PCR amplification of 491 bp and 582 bp, respectively, from *K. phaffii* genome. These  
334 reactions amplified sequences used for directing homologous recombination and  
335 substitution of the complete *ADE3* coding sequence. Meanwhile, primers ADE3lox-F  
336 and ADE3lox-R amplified the *kan<sup>R</sup>* G418 resistance cassette from plasmid pGKL [34].  
337 PCR fragments were assembled and cloned into pBluescript II SK<sup>+</sup> linearized with  
338 *Sma*I. A final PCR reaction using primers ADE3up-F and ADE3dw-R amplified the  
339 whole deletion cassette which was used for transformation of *K. phaffii* LA2. Cells were  
340 selected in YPD containing G418.

341 The resulting *ade2/ade3* strain was later transformed with pYRCre2 [35] and  
342 selected in YPD supplied with hygromycin B. This step promoted a Cre-mediated  
343 excision of the *kan* cassette thus eliminating G418 resistance. After PCR confirmation  
344 of marker recycling using primers ADE3conF and ADE3conR, the resulting strain was  
345 plated in non-selective YPD medium, causing loss of the pYRCre2 plasmid. The  
346 resulting strain was named LA3.

347

## 348 **Construction of centromeric plasmids containing *ADE3***

349 Plasmid pPICH [29], which is derived from pPICHOLI (MoBiTec), contains the  
350 ARS1 replicating sequence [1]. This sequence is originally located on *K. phaffii* GS115  
351 chromosome 2, coordinates 413701-413856 [2]. The plasmid was digested with *Not*I for  
352 cloning of the *K. phaffii* native *ADE3* gene. The complete gene was amplified from X-  
353 33 DNA using primers ADE3up-F and ADE3dw-R following digestion with *Not*I. After  
354 vector dephosphorylation, fragments were ligated and transformed into *E. coli* XL-10

355 Gold. One positive clone was then submitted to site-directed mutagenesis using primers  
356 Mut1(Hpa) and Mut2(Bam) for removal of the *Bam*HI restriction site present within the  
357 *ADE3* coding sequence. The final plasmid containing ARS1, the *Sh ble* resistance  
358 marker and *ADE3* was named pPICH-ADE3.

359 pPICH-ADE3 was digested with *Bam*HI for cloning of all four *K. phaffii*  
360 centromeres. These were amplified from *K. phaffii* X-33 genomic DNA using two PCR  
361 reactions for each centromeric sequence. Primers Cen1/2/3/4-F and Cen1/2/3/4c-R  
362 amplified the first inverted repeat of each centromere while primers Cen1/2/3/4c-F and  
363 Cen1/2/3/4-R amplified the other half of the sequences. In order to promote *in vitro/in*  
364 *vivo* assembly amplicons had approximately 80 bp homology between each other and  
365 15 bp with pPICH-ADE3. Firstly, we attempted an “In-Fusion” cloning reaction for  
366 each of the four centromeres using linearized pPICH-ADE3 and the two PCR  
367 fragments. Plasmids were extracted and analyzed by restriction digestion. Centromeres  
368 1, 2 and 4 were successfully assembled and cloned into the plasmid through this  
369 strategy.

370 Centromere 3 did not yield any *E. coli* clones following the “In-Fusion”  
371 reaction; therefore, we proceeded to an *in vivo* assembly strategy. Primers Cen370-F  
372 and Cen3c-R; Cen3c-F and Cen370-R amplified both inverted repeats adding 70 bp of  
373 homologous sequences between the fragments and pPICH-ADE3. Finally, we  
374 transformed *K. phaffii* LA3 using the linearized vector and both centromeric fragments,  
375 using 85 bp of homology for directing recombination. Clones were selected in YPD  
376 supplied with zeocin.

377 The resulting plasmids were named pPICH-CEN1, pPICH-CEN2, pPICH-CEN3  
378 and pPICH-CEN4. All plasmids were transformed into *K. phaffii* LA3 for subsequent  
379 stability and quantification assays.

380

## 381 **Stability analysis**

382 LA3 strain transformed with each of the four centromeric plasmids was grown in  
383 20 mL YPD for 16 hours at 28°C and 200 rpm. This culture was inoculated to 20 mL  
384 YPD to an initial OD of 0,1. After 24 h of growth under the same conditions the culture  
385 was used as inoculum for another flask containing 20 mL YPD to an OD of 0,1. This  
386 procedure was repeated every 24 h until a total of 144 hours. At 96 and 144 hours of  
387 growth, a culture sample was diluted 10<sup>6</sup>-fold and 100 µL of this dilution were plated on  
388 YPD. Plates were incubated at 30 °C for 72 h.

389

## 390 **References**

391

- 392 1. Cregg, J. M., Barringer, K. J., Hessler, a Y., Madden, K. R. *Pichia pastoris* as a host  
393 system for transformations. *Mol. Cell. Biol.* 1985; 5(12): 3376–85.
- 394 2. De Schutter, K., Lin, Y.-C., Tiels, P., Van Hecke, A., Glinka, S., Weber-Lehmann, J.,  
395 et al. Genome sequence of the recombinant protein production host *Pichia pastoris*. *Nat.*  
396 *Biotechnol.* 2009;27(6): 561–566.
- 397 3. Sturmberger, L., Chappell, T., Geier, M., Krainer, F., Day, K. J., Vide, U., et al.  
398 Refined *Pichia pastoris* reference genome sequence. *J. Biotechnol.* 2016; 235: 121–131.
- 399 4. Schwarzhans, J. P., Luttermann, T., Geier, M., Kalinowski, J., Friehs, K. Towards

- 400 systems metabolic engineering in *Pichia pastoris*. *Biotechnol. Adv.* 2017;35(6): 681–  
401 710.
- 402 5. Cereghino, J. L., Cregg, J. M. Heterologous protein expression in the methylotrophic  
403 yeast *Pichia pastoris*. *FEMS Microbiol. Rev.* 2000; 24(1): 45–66.
- 404 6. Obst, U., Lu, T. K., Sieber, V. A modular toolkit for generating *Pichia pastoris*  
405 secretion libraries. *ACS Synth. Biol.* 2017; 6 (6): 1016-1025.
- 406 7. Camattari, A., Goh, A., Yip, L. Y., Tan, A. H. M., Ng, S. W., Tran, A., et al.  
407 Characterization of a panARS-based episomal vector in the methylotrophic yeast *Pichia*  
408 *pastoris* for recombinant protein production and synthetic biology applications. *Microb.*  
409 *Cell Fact.* 2016;15(139). doi: 10.1186/s12934-016-0540-5
- 410 8. Schwarzhans, J.-P., Wibberg, D., Winkler, A., Luttermann, T., Kalinowski, J., Friehs,  
411 K. Integration event induced changes in recombinant protein productivity in *Pichia*  
412 *pastoris* discovered by whole genome sequencing and derived vector optimization.  
413 *Microb. Cell Fact.* 2016;15( 84). doi: 10.1186/s12934-016-0486-7
- 414 9. Yu, X., Wang, R., Zhang, M., Xu, Y., Xiao, R. Enhanced thermostability of a  
415 *Rhizopus chinensis* lipase by in vivo recombination in *Pichia pastoris*. *Microb. Cell*  
416 *Fact.* 2012;11(102). doi : 10.1186/1475-2859-11-102
- 417 10. Lee, C. C., Williams, T. G., Wong, D. W. S., Robertson, G. H. An episomal  
418 expression vector for screening mutant gene libraries in *Pichia pastoris*. *Plasmid*  
419 2005;54: 80–85.
- 420 11. Liachko, I., Youngblood, R. A., Tsui, K., Bubb, K. L., Queitsch, C., Raghuraman,  
421 M. K., et al. GC-Rich DNA elements enable replication origin activity in the  
422 methylotrophic yeast *Pichia pastoris*. *PLOS Genet.* 2014;10:3. doi:  
423 10.1371/journal.pgen.1004169

- 424 12. Cao, M., Gao, M., Lopez-Garcia, C. L., Wu, Y., Seetharam, A. S., Severin, A. J., et  
425 al. Centromeric DNA facilitates nonconventional yeast genetic engineering. *ACS Synth.*  
426 *Biol.* 2017; 6(8): 1545-1553.
- 427 13. Kouprina, N., Larionov, V. Transformation-associated recombination (TAR)  
428 cloning for genomics studies and synthetic biology. *Chromosoma* 2016; 125(4): 621-  
429 632.
- 430 14. Lyn Chan, F., Wong, L. H. Transcription in the maintenance of centromere  
431 chromatin identity. *Nucleic Acids Res.* 2012;40(22): 11178–11188.
- 432 15. Malik, H. S., Henikoff, S. Major evolutionary transitions in centromere complexity.  
433 *Cell* 2009;138(6): 1067–1082.
- 434 16. Morales, L., Noel, B., Porcel, B., Marcet-Houben, M., Hullo, M. F., Sacerdot, C., et  
435 al. Complete DNA sequence of *Kuraishia capsulata* illustrates novel genomic features  
436 among budding yeasts (Saccharomycotina). *Genome Biol. Evol.* 2013;5(12): 2524–  
437 2539.
- 438 17. Kitada, K., Yamaguchi, E., Arisawa, M. Isolation of a *Candida glabrata* centromere  
439 and its use in construction of plasmid vectors. *Gene* 1996;175(1-2): 105–108.
- 440 18. Ketel, C., Wang, H. S. W., McClellan, M., Bouchonville, K., Selmecki, A., Lahav,  
441 T., et al. Neocentromeres form efficiently at multiple possible loci in *Candida albicans*.  
442 *PLOS Genet.* 2009;5(3). doi: 10.1371/journal.pgen.1000400
- 443 19. Chatterjee, G., Sankaranarayanan, S. R., Guin, K., Thattikota, Y., Padmanabhan, S.,  
444 Siddharthan, R., et al. Repeat-associated fission yeast-like regional centromeres in the  
445 ascomycetous budding yeast *Candida tropicalis*. *PLOS Genet.* 2016;12(2). doi:  
446 10.1371/journal.pgen.1005839
- 447 20. Smirnova, J. B., McFarlane, R. J. The unique centromeric chromatin structure of

- 448 *Schizosaccharomyces pombe* is maintained during meiosis. J. Biol. Chem. 2002;  
449 277(22); 19817–19822.
- 450 21. Varoquaux, N., Liachko, I., Ay, F., Burton, J. N., Shendure, J., Dunham, M. J., et al.  
451 Accurate identification of centromere locations in yeast genomes using Hi-C. Nucleic  
452 Acids Res. 2015;43(11): 5331–5339.
- 453 22. Coughlan, A. Y., Hanson, S. J., Byrne, K. P., Wolfe, K. H. Centromeres of the yeast  
454 *Komagataella phaffii* (*Pichia pastoris*) have a simple inverted-repeat structure. Genome  
455 Biol. Evol. 2016;8(8): 2482–2492.
- 456 23. McCarroll, R. M., Fangman, W. L. Time of replication of yeast centromeres and  
457 telomeres. Cell 1988;54(4): 505–513.
- 458 24. Koren, A., Tsai, H., Tirosh, I., Burrack, L. S., Barkai, N., Berman, J. Epigenetically-  
459 inherited centromere and neocentromere DNA replicates earliest in s-phase. PLOS  
460 Genet. 2010;6(8). doi: 10.1371/journal.pgen.1001068
- 461 25. Nakamura, Y., Nishi, T., Noguchi, R., Ito, Y., Watanabe, T., Nishiyama, T., et al.  
462 Construction of a new stable, autonomously replicating plasmid vector containing  
463 *Pichia pastoris* centromeric DNA. Appl. Environ. Microbiol. 2018;84(15). doi:  
464 10.1128/AEM.02882-17
- 465 26. Hieter, P., Mann, C., Snyder, M., Davis, R. W. Mitotic stability of yeast  
466 chromosomes : a colony color assay that measures nondisjunction and chromosome  
467 loss. Cell 1985;40(2): 381–392.
- 468 27. Ugolini, S., Bruschi, C. V. The red/white colony color assay in the yeast  
469 *Saccharomyces cerevisiae*: epistatic growth advantage of white *ade8-18, ade2* cells over  
470 red *ade2* cells. Curr. Genet. 1996;30(6): 485–492.
- 471 28. Du, M., Battles, M. B., Nett, J. H. A color-based stable multi-copy integrant

472 selection system for *Pichia pastoris* using the attenuated *ADE1* and *ADE2* genes as  
473 auxotrophic markers. Bioeng. Bugs 2012;3(1): 32–37.

474 29. Piva, L. C., De Marco, J. L., de Moraes, L. M. P., Reis, V. C. B., Torres, F. A. G.  
475 Acetamidase as a dominant recyclable marker for *Komagataella phaffii* strain  
476 engineering. Appl. Microbiol. Biotechnol. 2018;102(6): 2753–2761.

477 30. Rébora, K., Laloo, B., Daignan-Fornier, B. Revisiting purine-histidine cross-  
478 pathway regulation in *Saccharomyces cerevisiae*: a central role for a small molecule.  
479 Genetics 2005;170(1): 61–70.

480 31. Steensels, J., Snoek, T., Meersman, E., Nicolino, M. P., Voordeckers, K.,  
481 Verstrepen, K. J. Improving industrial yeast strains: exploiting natural and artificial  
482 diversity. FEMS Microbiol. Rev. 2014;38(5): 947–995.

483 32. Sambrook, J., Fritsch, E., Maniatis, T. Molecular cloning: a laboratory manual. 2nd  
484 ed. New York: Cold Spring Harbor Laboratory Press; 1989.

485 33. Wu, S., Letchworth, G. J. High efficiency transformation by electroporation of  
486 *Pichia pastoris* pretreated with lithium acetate and dithiothreitol. Biotechniques  
487 2004;36(1): 152–154.

488 34. Reis, V. C. B., Nicola, A. M., de Souza Oliveira Neto, O., Batista, V. D. F., de  
489 Moraes, L. M. P., Torres, F. A. G. Genetic characterization and construction of an  
490 auxotrophic strain of *Saccharomyces cerevisiae* JP1, a Brazilian industrial yeast strain  
491 for bioethanol production. J. Ind. Microbiol. Biotechnol. 2012;39(11): 1673–1683.

492 35. Betancur, M. O., Reis, V. C. B., Nicola, A. M., De Marco, J. L., de Moraes, L. M.  
493 P., Torres, F. A. G. Multicopy plasmid integration in *Komagataella phaffii* mediated by  
494 a defective auxotrophic marker. Microb. Cell Fact. 2017;16(99). doi: 10.1186/s12934-  
495 017-0715-8

496 36. Karim, A. S., Curran, K. A., Alper, H. S. Characterization of plasmid burden and  
497 copy number in *Saccharomyces cerevisiae* for optimization of metabolic engineering  
498 applications. FEMS Yeast Res. 2013;13(1): 107-116  
499



X-33

LA2

LA3

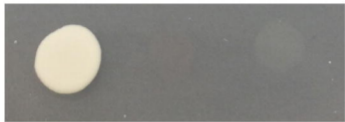

MD

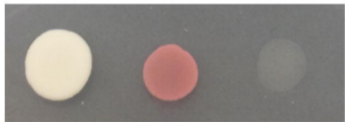

MD  
+Adenine

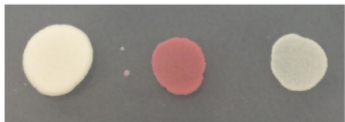

MD  
+Adenine  
+Histidine

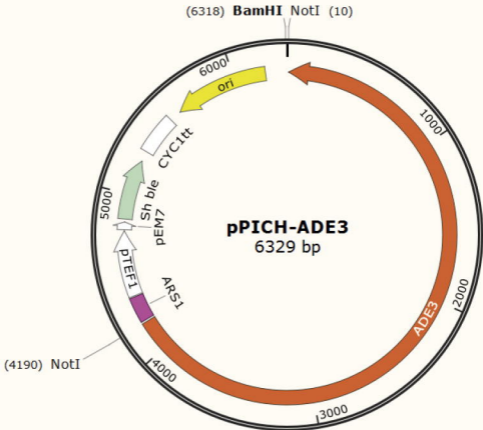

Cen1/2/3/4-F

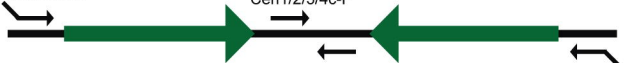

Cen1/2/3/4c-F

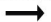

Cen1/2/3/4c-R

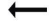

Cen1/2/3/4-R

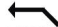

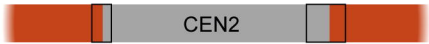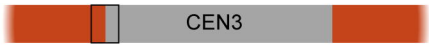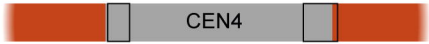

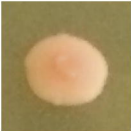

**pPICH-CEN1**

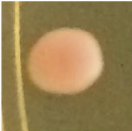

**pPICH-CEN2**

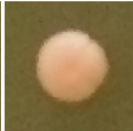

**pPICH-CEN3**

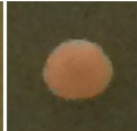

**pPICH-CEN4**

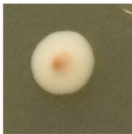

**pPICH-ADE3**

**A**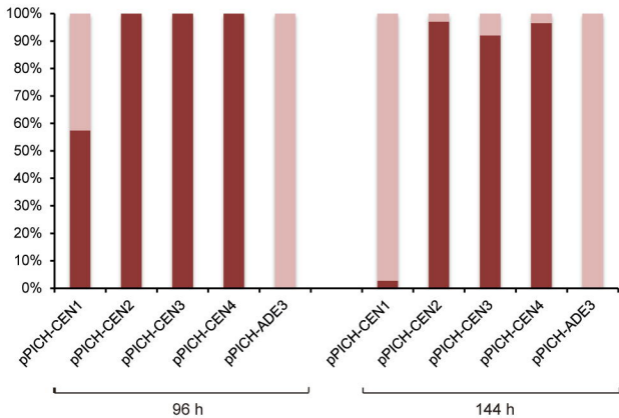**B**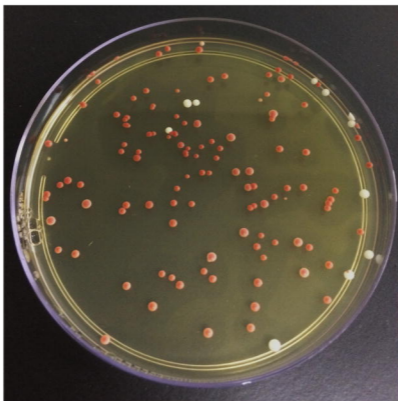

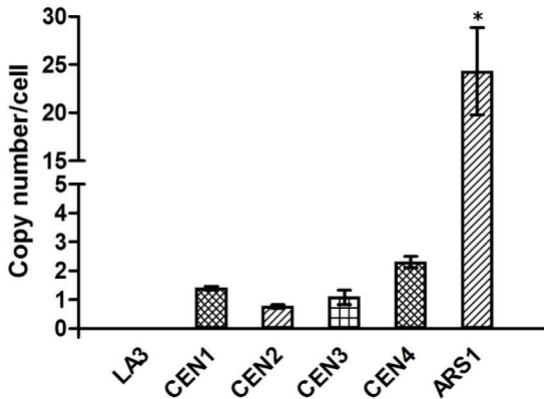

Source: https://www.biorxiv.org/content/10.1101/433417v2.full.pdf
