1            Cloning and functional characterization of *Komagataella phaffii*  
2                            centromeres by a color-based plasmid stability assay

3

4

5    Luiza Cesca Piva<sup>1</sup>, Janice Lisboa De Marco<sup>1</sup>, Lidia Maria Pepe de Moraes<sup>1</sup>, Viviane

6    Castelo Branco Reis<sup>1</sup>, Fernando Araripe Gonçalves Torres<sup>1\*</sup>

7

8    <sup>1</sup>Laboratório de Biologia Molecular, Universidade de Brasília, Brasília, DF, Brazil,

9    70910-900.

10

11    \*Corresponding author

12    E-mail: ftorres@unb.br

13

## 14 **Abstract**

15

16 The yeast *Komagataella phaffii* is widely used as a microbial host for heterologous  
17 protein production. However, molecular tools for this yeast are basically restricted to a  
18 few integrative and replicative plasmids. Four sequences that have recently been  
19 proposed as the *K. phaffii* centromeres could be used to develop a new class of  
20 mitotically stable vectors. In this work we designed a color-based genetic assay to  
21 investigate genetic stability in *K. phaffii*. Plasmids bearing *K. phaffii* centromeres and  
22 the *ADE3* marker were evaluated in terms of mitotic stability in an *ade2/ade3*  
23 auxotrophic strain which allows plasmid screening through colony color. Plasmid copy  
24 number was verified through qPCR. Our results confirmed that the centromeric  
25 plasmids were maintained at low copy number as a result of typical chromosome-like  
26 segregation during cell division. These features, combined with high transformation  
27 efficiency and *in vivo* assembly possibilities, prompt these plasmids as a new addition to  
28 the *K. phaffii* genetic toolbox.

29

30

## 31 **Introduction**

32

33 *Komagataella phaffii* is a methylotrophic yeast of great industrial importance  
34 which has been used for more than 30 years as a heterologous protein production  
35 platform [1]. Its genome was first published in 2009 and has since then been refined and  
36 thoroughly studied [2,3]. As a result, in addition to a protein factory, *K. phaffii* has also

37 been widely considered as a platform for the production of chemicals,  
38 biopharmaceuticals, vitamins and other molecules. However, the construction and  
39 regulation of new pathways demand complex molecular biology tools which are not  
40 readily available for this yeast [4].

41 *K. phaffii* genetic manipulation traditionally involves the use of shuttle vectors  
42 assembled in *Escherichia coli* and subsequently integrated into the yeast's genome [5].  
43 Recent studies have described the development of a wide range of genetic parts for use  
44 in this yeast, as well as new methods of plasmid assembly and transformation [6]. An  
45 alternative to integrative strategies is the use of replicative plasmids, which are usually  
46 based on the well-known ARS1 sequence [1]. These plasmids may overcome some  
47 drawbacks such as genetic instability in multi-copy strains, non-specific genomic  
48 integration and different expression levels depending on the integration *locus* [7-9]. In  
49 addition, they present higher transformation efficiency when compared to integrative  
50 vectors and can be assembled by *in vivo* recombination, which eliminates the need for  
51 bacterial transformation [10,11]. However, replicative plasmids show low mitotic  
52 stability when compared to integrative vectors and few vector options are available for  
53 use [12]. Stability problems can be circumvented by the creation of centromeric  
54 plasmids, which may provide proper segregation during mitosis. Greater mitotic  
55 stability as well as low copy number allow stable and constant protein expression [13].  
56 Centromeric plasmids can be constructed *in vivo*, allowing the assembly and cloning of  
57 large sequences including whole metabolic pathways and regulatory regions [14].  
58 Therefore, the construction of such vectors would be of great value for *K. phaffii* strain  
59 development in the context of synthetic biology.

60 Centromeres are typically surrounded by large heterochromatin sections in most  
61 organisms [15]. Their structure ranges from simple “point” centromeres of only ~125 bp  
62 in *Saccharomyces cerevisiae* to epigenetic, sequence-independent centromeres, such as  
63 those present in plants and animals. The reason for this phenomenon is that, for most  
64 eukaryotes, centromeres are maintained epigenetically and not genetically. Sequence  
65 homologies are rare in and between species, hindering the definition of a consensus  
66 sequence. In addition, some DNA regions can be centromeric or not depending on its  
67 function in previous cell cycles, which highlights the epigenetic nature of the  
68 centromere [16].

69 As for non-conventional yeasts, there are wide variations in centromere size and  
70 structure. *Candida glabrata* has centromeres that show some homology to the CDEI and  
71 CDEIII regions of *S. cerevisiae* while *Kuraishia capsulata* centromeres have 200-bp  
72 conserved sequences [17,18]. On the other hand, *Candida tropicalis*,  
73 *Schizosaccharomyces pombe* and *Candida albicans* have regional centromeres named  
74 after their sizes which range from 3 to 110 kb [19–21].

75 *K. phaffii* centromeres have recently been identified, bearing no sequence  
76 similarities to those of any other yeast [3]. Since centromere function relies strongly on  
77 its structure rather than on its sequence, a centromere-specific histone H3 variant  
78 (CSE4) was used in the search for centromeric regions in *K. phaffii*. A CSE4 homolog  
79 was identified in chromosome 2 and tagged with a fluorescence marker. The  
80 corresponding nuclear localization of the histone-DNA complex indicated a centromere  
81 pattern typical of budding yeasts [3]. Tridimensional conformation analysis followed  
82 the centromere clustering pattern observed in yeasts and narrowed down all four *K.*  
83 *phaffii* centromere locations to 20 kb windows [22].

84           Considering that a low transcription rate is typical of centromeric regions, RNA-  
85   seq analysis allowed researchers to pinpoint the putative centromeric locations for all  
86   four *K. phaffii* centromeres [3]. Similarly to *C. tropicalis* and *S. pombe*, *K. phaffii*  
87   centromeres are formed by inverted repeats. All four sequences have two inverted  
88   repeats of ~2,5 kb, separated by a central segment of 800 to 1300 bp. Chromatin  
89   immunoprecipitation sequencing analysis showed that the CSE4 histone binds  
90   preferably to the central region, but also along the inverted repeats [23].

91           *K. phaffii* centromeric sequences contain early replication peaks with  
92   autonomously replicating sequences, characteristics that are also observed in  
93   centromeres of other yeasts [24,25]. According to recently published studies, there are  
94   native ARS sequences contained within centromeres 2, 3 and 4. These comprise regions  
95   within the inverted repeats, as well as unique adjacent sequences [23,26].

96           In order to expand the functional analysis of the *K. phaffii* centromeres we  
97   sought in this study to develop a genetic system based on an *ade2/ade3* auxotrophic  
98   strain and a replicative vector carrying the wild-type *ADE3*. Vectors carrying *K. phaffii*  
99   centromeres were used to assess plasmid copy number and mitotic stability.

100

## 101   **Results and Discussion**

102

103           In yeasts, the adenine synthesis pathway is used as a tool for auxotrophic  
104   selection, gene copy number indicator and for plasmid stability analysis [27]. Many  
105   genes from this pathway have been deleted in *S. cerevisiae* in order to create  
106   auxotrophic strains, while in *K. phaffii* studies have only focused on *ADE1* and *ADE2*  
107   [28,29]. *K. phaffii* LA2, a strain mutant for *ADE2* [30], was used as a starting point for

108 the construction of a strain that would allow plasmid stability verification. Deletion of  
109 *ADE2* results in cells that are auxotrophic for adenine and accumulate a red intermediate  
110 [27] while deletion of genes located upstream, such as *ADE1* or *ADE3*, should prevent  
111 the formation of such pigment [28]. As expected, *ADE3* deletion in the LA3 strain  
112 results in white colonies (Fig 1). The deletion of this gene in *S. cerevisiae* has regulatory  
113 effects in the histidine synthesis pathway [31]. Consequently, *ade2 ade3* strains are not  
114 only auxotrophic for adenine, but also for histidine. In order to verify if this phenotype  
115 is applicable to *K. phaffii*, we plated strains X-33, LA2 and LA3 on MD medium  
116 without supplementation, comparing growth and colony color to cells plated on MD  
117 medium with adenine and histidine (Fig 1). LA3 strain displayed the expected histidine  
118 auxotrophy phenotype, showing that the adenine-histidine pathways in *K. phaffii* and *S.*  
119 *cerevisiae* have common characteristics.

120

121 **Fig 1. Strain phenotypic analysis on defined media.** *K. phaffii* X-33 (wild-type), LA2  
122 and LA3 cultures were spotted on MD medium with or without supplementation.

123

124 In order to assess plasmid stability, we first constructed plasmid pPICH-ADE3  
125 bearing the *ADE3* gene (Fig 2). When transformed with pPICH-ADE3, LA3 cells  
126 should return to being red and any changes on colony color would allow a simple  
127 screening of plasmid loss [27]. Although adenine auxotrophy has been explored for  
128 other purposes in *K. phaffii* [29], this particular color-based system has not yet been  
129 used for measuring plasmid stability in this yeast.

130

131 **Fig 2. Map of vector pPICH-ADE3.** ARS1 was used as the autonomously replicative  
132 sequence and *Sh ble* was used as the zeocin resistance marker. The *NotI* site was used  
133 for cloning the *K. phaffii ADE3* gene.

134

135 pPICH-ADE3 was used for cloning *K. phaffii* centromeres. Since it revealed  
136 extremely difficult to amplify entire centromeric regions, we designed a strategy to  
137 amplify centromeres in halves in order to reduce fragment size and to avoid primer  
138 annealing inside the inverted repeats (Fig 3). Amplified fragments exhibited in their  
139 ends overlapping regions that would allow recombination between each other and with  
140 vector pPICH-ADE3. Centromeric primer sequences were designed using *K. phaffii*  
141 GS115 genome sequence as reference [2]. The amplified regions corresponded to the  
142 following chromosomal coordinates: chromosome 1 position 1401429-1406917 (5488  
143 bp); chromosome 2 position 1543739-1550657 (6918 bp); chromosome 3 position  
144 2204800-2211493 (6693 bp) and chromosome 4 position 1703369-1709958 (6589 bp).  
145 Despite several attempts, we were unable to clone the centromere present in  
146 chromosome 3, which was excluded from our analysis. We speculate that its repetitive  
147 motifs, which were unlike those present in the other *K. phaffii* centromeres, rendered it  
148 extremely unstable in *E. coli*.

149

150 **Fig 3. Strategy for *K. phaffii* centromere amplification.** Schematic representation of a  
151 typical *K. phaffii* centromere. Inverted repeats are represented by green arrows. Primer  
152 annealing regions are shown by small arrows.

153

154 Centromeric sequences are known as early replication regions and according to  
155 recently published studies there are native ARS contained within centromeres 2, 3 and 4  
156 [12, 23]. Fig 4 illustrates the positions of the ARS within and around these centromeres.  
157 In chromosome 2, ARS are located on coordinates 1543374-1543971 (597 bp) and  
158 1549967-1551156 (1189 bp). These were partially amplified in this work, containing  
159 232 and 690 bp, respectively. Regarding chromosome 3, there is an ARS located on  
160 coordinates 2204369-2205185 (816 bp) which was also partially amplified with 385 bp.  
161 Chromosome 4 has an ARS on coordinates 1703466-1704103 (637 bp), which was fully  
162 amplified, as well as a partially amplified one (840 bp) on coordinates 1709118-  
163 1710114 (996 bp total) [12].

164

165 **Fig 4. Relative positions of ARS sequences around centromeres 2, 3 and 4 of *K.***

166 *phaffii*. Regions in gray represent the centromeric sequences amplified in this work.

167 Black boxes indicate identified ARS sequences [11].

168

169 LA3 strain was individually transformed with pPICH-ADE3 and centromeric  
170 plasmids pPICH-CEN1, 2 and 4, which were verified for autonomous replication by  
171 plasmid rescue in *E. coli* following restriction digestion with *NotI* to verify vector  
172 integrity (S1 Fig).

173 Plasmid stability was firstly verified through colony color in non-selective  
174 medium (Fig 5). When plated on YPD non-selective medium, colonies transformed with  
175 pPICH-ADE3 lost their color rapidly and presented a red center with large white edges,  
176 a result consistent with plasmid instability. In contrast, strains transformed with  
177 centromeric plasmids presented a uniform red coloration throughout the colony.



178

179 **Fig 5. Plasmid stability analysis.** LA3 strain transformed with pPICH-ADE3 and the  
180 centromeric plasmids was grown on YPD medium for 3 days until color development.

181

182 Further stability examination of the centromeric plasmids was performed by  
183 growing cells in liquid YPD medium for 144 hours. After diluting and plating cultures  
184 on non-selective medium, red and white colonies were counted and compared between  
185 each construction (Fig 6). LA3 strain transformed with pPICH-ADE3 did not yield red  
186 colonies in any growth period, indicating that the plasmid was mitotically unstable.  
187 Conversely, centromeric plasmids presented a higher mitotic stability than pPICH-  
188 ADE3. After 96 hours of growth, cells with pPICH-CEN1 started to present white  
189 colonies, while the other centromeric plasmids remained stable. After 144 hours,  
190 pPICH-CEN1 was lost in most colonies while the other centromeric plasmids were lost  
191 in <10% cells. The reason for the instability of pPICH-CEN1 could be related to the  
192 absence of an autonomously replicating sequence within the centromere, since  
193 centromeres 2 and 4 were cloned with at least partially amplified ARSs. The original  
194 replicating sequence in the pPICH-ADE3 plasmid, ARS1, has shown to be less efficient  
195 than its modern counterparts, therefore new ARSs contained in the centromeres could  
196 have enhanced the centromeric plasmids' mitotic stability [12].

197

198 **Fig 6. Plasmid stability test.** (A) Aliquots of the liquid cultures were collected after 96  
199 and 144 hours of growth and plated on YPD medium. Red colonies represent cells that  
200 maintained the *ADE3*-containing plasmid, while white colonies have lost it. Red

201 portions of the bars represent red colonies; light pink bars represent white colonies. (B)  
202 A plate representing a typical result after 144 h growth.

203

204 Yeast centromeric plasmids knowingly have a higher mitotic stability under non-  
205 selective conditions than common replicative vectors since they are equally segregated  
206 between daughter cells and therefore provide a uniform culture of cells containing the  
207 plasmid [27]. A centromeric vector containing *K. phaffii* CEN2 has been constructed  
208 and it presented an enhanced stability when compared to a replicative plasmid [26]. In  
209 addition to *K. phaffii* and *S. cerevisiae*, centromeric plasmids have been developed for  
210 other yeasts such as *S. pombe*, *C. glabrata* and *Scheffersomyces stipitis* and in all cases  
211 an enhanced plasmid stability under non-selective conditions was verified [13,18].

212 Yeast replicative plasmids are normally replicated but are unevenly distributed  
213 between daughter cells, which creates both multi-copy and plasmidless cells [27]. Under  
214 selective conditions, cells lacking the plasmid are unable to survive and the result is a  
215 population of multi-copy plasmid-containing cells. The construction of centromeric  
216 plasmids should provide better plasmid segregation and stability and cells should  
217 maintain a low and stable plasmid copy number during yeast growth [32]. Plasmid copy  
218 number was assessed by qPCR after strains were grown in YPD medium containing  
219 zeocin in order to ensure that all cells assayed were harboring the centromeric plasmids.  
220 The results were compared to the LA3 strain transformed with pPICH-ADE3 also  
221 grown in selective medium and to the LA3 control strain, grown in YPD medium.  
222 qPCR results (Fig 7) indicate that the strain transformed with centromeric plasmids  
223 carried 1-2 copies per cell while the replicative plasmid was present at approximately 25  
224 copies per cell. The difference in plasmid copy number between the replicative vector

225 and the centromeric vectors was significant according to a t-test ( $p < 0.05$ ). This result  
226 illustrates the expected segregation pattern described above for growth in selective  
227 conditions and, together with the mitotic stability analysis, provides a clear picture of *K.*  
228 *phaffii* genetic manipulation using centromeric plasmids.

229

230 **Fig 7. Plasmid copy number determination.** The number of plasmids in each cell was  
231 estimated by qPCR. LA3 was used as negative control. Statistical analysis comparing  
232 each of the centromeric plasmids with the replicative vector was performed through a t-  
233 test using GraphPad Prism 5. ( $p < 0.05$ ). Error bars depict the standard deviation of the  
234 mean ( $n = 3$ ).

235

236 *S. cerevisiae* centromeric plasmids, in comparison to plasmids bearing the 2  
237 micron sequence, presented the same difference in copy numbers when auxotrophic  
238 markers were used. However, when *kanMX* G418 resistance marker was used, the  
239 plasmid copy numbers did not differ between centromeric and replicative plasmids [37].  
240 This indicates that factors other than the type of replication origin can influence plasmid  
241 copy numbers. In a previous study, *K. phaffii* transformed with a plasmid containing  
242 centromere 2 was analyzed regarding plasmid copy number and compared to both a  
243 replicative plasmid and an integrative strategy [26]. Results exhibited a low number of  
244 plasmids per cell in all strategies, which does not correspond to our observation. The  
245 difference may be related to the different strains, culture conditions or plasmid  
246 constructions, since although both plasmids used the ARS1 replicative sequence and the

247 zeocin resistance marker, pPICH-CEN1, 2, and 4 contained the *ADE3* gene while the  
248 previously reported centromeric plasmid carried an *EGFP* reporter gene.

249 Overall, our results indicate that centromeric plasmids could be employed as a  
250 new tool for the genetic manipulation of *K. phaffii*. Plasmids were maintained for long  
251 periods in non-selective medium, indicating that growth can be performed without the  
252 addition of antibiotics or any form of selective pressure. The centromeric plasmids' low  
253 copy numbers per cell characterize a stable and homogeneous culture that can provide  
254 reliable expression results. Finally, their structure as a circular molecule allows *in vivo*  
255 plasmid assembly with relatively short homologous sequences when compared to  
256 genomic integration techniques where sequences have to be much longer for directed  
257 homologous recombination. Simpler assembly may also facilitate the construction of  
258 larger and more sophisticated vectors such as yeast artificial chromosomes (YAC),  
259 whose stability features may be also analysed by the color-based assay described in this  
260 work.

261

## 262 **Materials and methods**

263

### 264 **Strains and Media**

265 DNA cloning was performed using chemically competent *Escherichia coli* XL-  
266 10 Gold (Agilent Technologies) grown in LB medium (5 g L<sup>-1</sup> yeast extract, 10 g L<sup>-1</sup>  
267 peptone and 10 g L<sup>-1</sup> NaCl, pH 7.2). When needed, agar was added to a final  
268 concentration of 1.5%. When zeocin (25 µg mL<sup>-1</sup>) was used for bacterial antibiotic  
269 selection, NaCl concentration was reduced to 5 g L<sup>-1</sup>.

270 *K. phaffii* strains were derived from X-33 (Invitrogen). LA2 strain (*amd2 ade2*)  
271 was described in previous work [30]. Yeast was routinely grown in YPD medium (10 g  
272 L<sup>-1</sup> yeast extract, 20 g L<sup>-1</sup> peptone and 20 g L<sup>-1</sup> glucose). Solid medium used 2% agar.  
273 Zeocin and geneticin, when used, were added at 100 µg mL<sup>-1</sup> and 500 µg mL<sup>-1</sup>,  
274 respectively. Hygromycin B was used to a final concentration of 50 µg mL<sup>-1</sup>. Minimal  
275 medium (MD) used 0.34% Yeast Nitrogen Base, 1% (NH<sub>4</sub>)<sub>2</sub>SO<sub>4</sub>, 2% glucose,  
276 0.00004% biotin, and 0.0002% adenine or 0.004% histidine, when needed.

277

## 278 PCR

279 DNA was amplified using Invitrogen Platinum Taq DNA Polymerase (High  
280 Fidelity), Promega GoTaq Colorless Master Mix or Sigma-Aldrich Accutaq LA DNA  
281 Polymerase. All primers used in this work are shown in Table 1.

282

283 **Table 1. Primers used in this work.**

| Primer    | Sequence                                                        | Enzyme       |
|-----------|-----------------------------------------------------------------|--------------|
| ADE3up-F  | GATAAGCTTGATATCGAATTCCTGCAGCCCCC<br>GGGACGTAATGGAATAACTGCTGAC   | <i>Sma</i> I |
| ADE3up-R  | GAAGTTATGGATCCTACGAGGTAATTGAAGGCT<br>CAC                        |              |
| ADE3lox-F | CTTCAATTACCTCGTAGGATCCATAACTTCGTAT<br>AATG                      |              |
| ADE3lox-R | CAATCTCTCCCTTGTCATCGGATCCATAACTTCG<br>TATAG                     |              |
| ADE3dw-F  | GAAGTTATGGATCCGATGACAAGGGAGAGATT<br>GAAG                        |              |
| ADE3dw-R  | GGTGGCGGCCGCTCTAGAACTAGTGGATCCCC<br>CCCGGGTGCAATGTACTGTTGAGTAGG | <i>Sma</i> I |
| ADE3conF  | GGGACCGGAGGTAAAAGAC                                             |              |
| ADE3conR  | GTTGGAATAATTGCATGGTCTG                                          |              |

|           |                                                                                                                   |               |
|-----------|-------------------------------------------------------------------------------------------------------------------|---------------|
| MUT1(Hpa) | CCATTGACATGGTAAACAGTTGGA                                                                                          |               |
| MUT2(Bam) | GAACACTGGGATCTTGGTTGAGG                                                                                           |               |
| Cen1-F    | GAGTTTAAAC <u>CGGATCC</u> ACGAAGCAATGGATAG<br>GCACT                                                               | <i>Bam</i> HI |
| Cen1-R    | CCGCGAATTC <u>CGGATCC</u> TGAAGTCTTTCAGAGAG<br>GAGCA                                                              | <i>Bam</i> HI |
| Cen1c-F   | CAAGTATGCGTGATCCCAGGT                                                                                             |               |
| Cen1c-R   | TACGAATTGTGGGGCTCTGT                                                                                              |               |
| Cen2-F    | GAGTTTAAAC <u>CGGATCC</u> ATCTCCGTTGATACTCC<br>CAAC                                                               | <i>Bam</i> HI |
| Cen2-R    | CCGCGAATTC <u>CGGATCC</u> ATCGACAAGCAGAACA<br>CTAAG                                                               | <i>Bam</i> HI |
| Cen2c-F   | GAATGGAGGTGCTGGTGGTTA                                                                                             |               |
| Cen2c-R   | TGTAATGCTCGCTGGTGAGT                                                                                              |               |
| Cen3-F    | GAGTTTAAAC <u>CGGATCC</u> AAGTGGTACACCAGTCA<br>GCG                                                                | <i>Bam</i> HI |
| Cen3-R    | CCGCGAATTC <u>CGGATCC</u> TCAGTATTCAACTGCAA<br>CTGC                                                               | <i>Bam</i> HI |
| Cen3c-F   | TCAGCCGAATACCCACACTT                                                                                              |               |
| Cen3c-R   | TCAGCCGTCAGCGAAATGAT                                                                                              |               |
| Cen4-F    | GAGTTTAAAC <u>CGGATCC</u> CAAACGCACCGTCTTGT<br>TCA                                                                | <i>Bam</i> HI |
| Cen4-R    | CCGCGAATTC <u>CGGATCC</u> AATTGATGTAGACGAGC<br>AGC                                                                | <i>Bam</i> HI |
| Cen4c-F   | TCAAGAATCGTACTGGCACCT                                                                                             |               |
| Cen4c-R   | CAAGCTCGTGAGATGGGATGT                                                                                             |               |
| Cen370-F  | CGCTCAGTGGAACGAAAACCTCACGTTAAGGGA<br>TTTGGTCATGAGATCAGATCTAACATCCAAAGA<br>CGAAAGGTTGAATGAGTTTAAACGGATCCAAGT<br>GG |               |
| Cen370-R  | GCTGGCCCTCTCTTCCAGCTCACGAATCAGAT<br>CCTAAGTCCTACTCAACAGTACATTGCAGCGGC<br>CGCGTTTAAACGAATTCGGATCCTCAGTATTCA<br>A   |               |
| qZEO-F    | CGACGTGACCCTGTTCATCA                                                                                              |               |

|        |                       |  |
|--------|-----------------------|--|
| qZEO-R | TGGACACGACCTCCGACCA   |  |
| qHIS-F | GTGTATCCTGGCTTGGCATCT |  |
| qHIS-R | GCCAAGTACGGTGTGACGTT  |  |

284 Restriction sites are underlined.

285

## 286 **DNA manipulation**

287 All basic DNA manipulation and analysis were performed as previously  
288 described [33]. Restriction digestion was performed in accordance to the manufacturer  
289 instructions (New England Biolabs), as well as vector dephosphorylation with Shrimp  
290 Alkaline Phosphatase (Promega) and ligation with T4 DNA Ligase (USB). In-Fusion  
291 Cloning Kit (Clontech) was used for in-vitro assembly of plasmids. Site-directed  
292 mutagenesis was performed using the Transformer Site-Directed Mutagenesis Kit  
293 (Clontech). PCR and gel purification used Promega Wizard SV Gel and PCR Clean-Up  
294 System.

295

## 296 **Quantitative PCR (qPCR)**

297 Strains harboring the zeocin resistance plasmids were grown to an OD<sub>600</sub> (optical  
298 density measured at 600 nm) of 1 in 10 mL YPD containing zeocin while LA3 was  
299 grown in 10 mL YPD. Cells were collected by centrifugation at 2000 x g for 5 minutes.  
300 The cell pellet was resuspended with 1 mL 0.25% SDS and incubated at 98°C for 8  
301 minutes according to previous work [26]. Finally, cell debris was removed by  
302 centrifugation and DNA was diluted 10-fold in water before qPCR reactions.

303 Quantitative PCR reactions used primers qZEO-F and qZEO-R for plasmid  
304 quantification and qHIS-F and qHIS-R as an internal single-copy control. Assays were

305 carried out with iTaq Universal SYBR Green Supermix (Bio-Rad) in a Rotor-Gene Q  
306 (Qiagen) thermal cycler. Analysis used the absolute quantification method and standard  
307 curves that ranged from  $1 \times 10^4$  to  $1 \times 10^8$  copies of the gene of interest. pPIC9  
308 (Invitrogen) and pPICH linearized plasmids were used for construction of the standard  
309 curves.

310

## 311 **Yeast transformation**

312 *K. phaffii* was electroporated following two different protocols. For integrative  
313 cassettes, we followed the *Pichia* Expression Kit protocol (Invitrogen) and when using  
314 replicative plasmids, we proceeded as described previously [34].

315

## 316 **Construction of an *ade2 ade3* strain for color-based stability**

### 317 **assays**

318 Strain LA2 [30] was transformed with an *ADE3* deletion cassette and had the  
319 marker recycled before transformation with the centromeric plasmids. Construction of  
320 the deletion cassette used PCR reactions assembled by an “In-Fusion” cloning reaction.  
321 Briefly, primers ADE3up-F and R, ADE3dw-F and R were used for PCR amplification  
322 of 491 bp and 582 bp, respectively, from the *K. phaffii* genome. These reactions  
323 amplified sequences used for directing homologous recombination and substitution of  
324 the complete *ADE3* coding sequence. Meanwhile, primers ADE3lox-F and ADE3lox-R  
325 amplified the *kanR* geneticin resistance cassette from plasmid pGKL [35]. PCR  
326 fragments were assembled and cloned into pBluescript II SK<sup>+</sup> linearized with *Sma*I. A  
327 final PCR reaction using primers ADE3up-F and ADE3dw-R amplified the whole



328 deletion cassette which was used for transformation of *K. phaffii* LA2. Cells were  
329 selected in YPD containing geneticin.

330 The resulting *ade2 ade3* strain was later transformed with pYRCre2 [36] and  
331 selected in YPD supplied with hygromycin B. This step promoted a Cre-mediated  
332 excision of the *kanR* cassette eliminating geneticin resistance. After PCR confirmation  
333 of marker recycling using primers ADE3conF and ADE3conR, the resulting strain was  
334 plated in non-selective YPD medium, causing loss of the pYRCre2 plasmid. The  
335 resulting strain was named LA3.

336

### 337 **Construction of centromeric plasmids containing *ADE3***

338 Plasmid pPICH [30], which is derived from pPICHOLI (MoBiTec), contains the  
339 ARS1 replicating sequence [1]. This sequence is originally located on *K. phaffii* GS115  
340 chromosome 2, coordinates 413701-413856 [2]. The plasmid was digested with *NotI* for  
341 cloning of the *K. phaffii* native *ADE3*. The complete gene was amplified from X-33  
342 DNA using primers ADE3up-F and ADE3dw-R following digestion with *NotI*. After  
343 vector dephosphorylation, fragments were ligated and transformed into *E. coli* XL-10  
344 Gold. One positive clone was then submitted to site-directed mutagenesis using primers  
345 Mut1(Hpa) and Mut2(Bam) for removal of the *BamHI* restriction site present within the  
346 *ADE3* coding sequence. The final plasmid containing ARS1, the *Sh ble* resistance  
347 marker and *ADE3* was named pPICH-ADE3.

348 pPICH-ADE3 was digested with *BamHI* for cloning of all four *K. phaffii*  
349 centromeres. These were amplified from *K. phaffii* X-33 genomic DNA using two PCR  
350 reactions for each centromeric sequence. Primers Cen1/2/3/4-F and Cen1/2/3/4c-R  
351 amplified the first inverted repeat of each centromere while primers Cen1/2/3/4c-F and

352 Cen1/2/3/4-R amplified the other half of the sequences. In order to promote *in vitro/in*  
353 *vivo* assembly, the amplicons had ~80 bp homology between each other in one end and  
354 15 bp with pPICH-ADE3 in the other end. First, we attempted an “In-Fusion” cloning  
355 reaction for each of the four centromeres using linearized pPICH-ADE3 and the two  
356 PCR fragments. Plasmids were extracted and analyzed by restriction digestion.  
357 Centromeres 1, 2 and 4 were successfully assembled and cloned into the plasmid  
358 through this strategy. Centromere 3 did not yield any *E. coli* clones following the “In-  
359 Fusion” reaction; we then proceeded to an *in vivo* assembly strategy. Primers Cen370-F  
360 and Cen3c-R; Cen3c-F and Cen370-R amplified both inverted repeats adding 70 bp of  
361 homologous sequences between the fragments and pPICH-ADE3. Finally, we  
362 transformed *K. phaffii* LA3 using the linearized vector and both centromeric fragments,  
363 using 85 bp of homology for directing recombination. Clones were selected in YPD  
364 supplied with zeocin. However, none of the obtained clones presented the assembled  
365 plasmid as it was expected and this centromeric sequence was not used in further  
366 analyses.

367 The resulting plasmids were named pPICH-CEN1, pPICH-CEN2, and pPICH-  
368 CEN4. All plasmids were transformed into *K. phaffii* LA3 for subsequent stability and  
369 quantification assays.

370

## 371 **Stability analysis**

372 LA3 strain transformed with each of the three centromeric plasmids was grown  
373 in 20 mL YPD for 16 hours at 28°C and 200 rpm. This culture was inoculated to 20 mL  
374 YPD to an initial OD of 0.1. After 24 h of growth under the same conditions the culture  
375 was used as inoculum for another flask containing 20 mL YPD to an OD of 0.1. This

376 procedure was repeated every 24 h until a total of 144 hours. At 96 and at 144 hours of  
377 growth, a small amount of cells was diluted 10<sup>6</sup>-fold and 100 µL of this dilution were  
378 plated on YPD. Plates were incubated at 30 °C for 72 h.

379

## 380 **References**

381

382 1. Cregg, J. M., Barringer, K. J., Hessler, a Y., Madden, K. R. *Pichia pastoris* as a host  
383 system for transformations. *Mol. Cell. Biol.* 1985; 5(12): 3376–85.

384 2. De Schutter, K., Lin, Y.-C., Tiels, P., Van Hecke, A., Glinka, S., Weber-Lehmann, J.,  
385 et al. Genome sequence of the recombinant protein production host *Pichia pastoris*. *Nat.*  
386 *Biotechnol.* 2009;27(6): 561–566.

387 3. Sturmberger, L., Chappell, T., Geier, M., Krainer, F., Day, K. J., Vide, U., et al.  
388 Refined *Pichia pastoris* reference genome sequence. *J. Biotechnol.* 2016; 235: 121–131.

389 4. Schwarzhans, J. P., Luttermann, T., Geier, M., Kalinowski, J., Friehs, K. Towards  
390 systems metabolic engineering in *Pichia pastoris*. *Biotechnol. Adv.* 2017;35(6): 681–  
391 710.

392 5. Cereghino, J. L., Cregg, J. M. Heterologous protein expression in the methylotrophic  
393 yeast *Pichia pastoris*. *FEMS Microbiol. Rev.* 2000; 24(1): 45–66.

394 6. Obst, U., Lu, T. K., Sieber, V. A modular toolkit for generating *Pichia pastoris*  
395 secretion libraries. *ACS Synth. Biol.* 2017; 6 (6): 1016-1025.

396 7. Camattari, A., Goh, A., Yip, L. Y., Tan, A. H. M., Ng, S. W., Tran, A., et al.  
397 Characterization of a panARS-based episomal vector in the methylotrophic yeast *Pichia*  
398 *pastoris* for recombinant protein production and synthetic biology applications. *Microb.*  
399 *Cell Fact.* 2016;15(139). doi: 10.1186/s12934-016-0540-5

- 400 8. Schwarzhans, J.-P., Wibberg, D., Winkler, A., Luttermann, T., Kalinowski, J., Friehs,  
401 K. Integration event induced changes in recombinant protein productivity in *Pichia*  
402 *pastoris* discovered by whole genome sequencing and derived vector optimization.  
403 Microb. Cell Fact. 2016;15( 84). doi: 10.1186/s12934-016-0486-7
- 404 9. Berg, L., Strand, T. A., Valla, S., Brautaset, T. Combinatorial mutagenesis and  
405 selection to understand and improve yeast promoters. Biomed Res. Int. 2013;926985.  
406 doi: 10.1155/2013/926985
- 407 10. Yu, X., Wang, R., Zhang, M., Xu, Y., Xiao, R. Enhanced thermostability of a  
408 *Rhizopus chinensis* lipase by in vivo recombination in *Pichia pastoris*. Microb. Cell  
409 Fact. 2012;11(102). doi : 10.1186/1475-2859-11-102
- 410 11. Lee, C. C., Williams, T. G., Wong, D. W. S., Robertson, G. H. An episomal  
411 expression vector for screening mutant gene libraries in *Pichia pastoris*. Plasmid  
412 2005;54: 80–85.
- 413 12. Liachko, I., Youngblood, R. A., Tsui, K., Bubb, K. L., Queitsch, C., Raghuraman,  
414 M. K., et al. GC-Rich DNA elements enable replication origin activity in the  
415 methylotrophic yeast *Pichia pastoris*. PLOS Genet. 2014;10:3. doi:  
416 10.1371/journal.pgen.1004169
- 417 13. Cao, M., Gao, M., Lopez-garcia, C. L., Wu, Y., Seetharam, A. S., Severin, A. J., et  
418 al. Centromeric DNA facilitates nonconventional yeast genetic engineering. ACS Synth.  
419 Biol. 2017; 6(8): 1545-1553.
- 420 14. Kouprina, N., Larionov, V. Transformation-associated recombination (TAR)  
421 cloning for genomics studies and synthetic biology. Chromosoma 2016; 125(4): 621-  
422 632.
- 423 15. Lyn Chan, F., Wong, L. H. Transcription in the maintenance of centromere

- 424 chromatin identity. *Nucleic Acids Res.* 2012;40(22): 11178–11188.
- 425 16. Malik, H. S., Henikoff, S. Major evolutionary transitions in centromere complexity.  
426 *Cell* 2009;138(6): 1067–1082.
- 427 17. Morales, L., Noel, B., Porcel, B., Marcet-Houben, M., Hullo, M. F., Sacerdot, C., et  
428 al. Complete DNA sequence of *Kuraishia capsulata* illustrates novel genomic features  
429 among budding yeasts (Saccharomycotina). *Genome Biol. Evol.* 2013;5(12): 2524–  
430 2539.
- 431 18. Kitada, K., Yamaguchi, E., Arisawa, M. Isolation of a *Candida glabrata* centromere  
432 and its use in construction of plasmid vectors. *Gene* 1996;175(1-2): 105–108.
- 433 19. Ketel, C., Wang, H. S. W., McClellan, M., Bouchonville, K., Selmecki, A., Lahav,  
434 T., et al. Neocentromeres form efficiently at multiple possible loci in *Candida albicans*.  
435 *PLOS Genet.* 2009;5(3). doi: 10.1371/journal.pgen.1000400
- 436 20. Chatterjee, G., Sankaranarayanan, S. R., Guin, K., Thattikota, Y., Padmanabhan, S.,  
437 Siddharthan, R., et al. Repeat-associated fission yeast-like regional centromeres in the  
438 ascomycetous budding yeast *Candida tropicalis*. *PLOS Genet.* 2016;12(2). doi:  
439 10.1371/journal.pgen.1005839
- 440 21. Smirnova, J. B., McFarlane, R. J. The unique centromeric chromatin structure of  
441 *Schizosaccharomyces pombe* is maintained during meiosis. *J. Biol. Chem.* 2002;  
442 277(22); 19817–19822.
- 443 22. Varoquaux, N., Liachko, I., Ay, F., Burton, J. N., Shendure, J., Dunham, M. J., et al.  
444 Accurate identification of centromere locations in yeast genomes using Hi-C. *Nucleic*  
445 *Acids Res.* 2015;43(11): 5331–5339.
- 446 23. Coughlan, A. Y., Hanson, S. J., Byrne, K. P., Wolfe, K. H. Centromeres of the yeast  
447 *Komagataella phaffii* (*Pichia pastoris*) have a simple inverted-repeat structure. *Genome*

- 448 Biol. Evol. 2016;8(8): 2482–2492.
- 449 24. McCarroll, R. M., Fangman, W. L. Time of replication of yeast centromeres and  
450 telomeres. Cell 1988;54(4): 505–513.
- 451 25. Koren, A., Tsai, H., Tirosh, I., Burrack, L. S., Barkai, N., Berman, J. Epigenetically-  
452 inherited centromere and neocentromere DNA replicates earliest in s-phase. PLOS  
453 Genet. 2010;6(8). doi: 10.1371/journal.pgen.1001068
- 454 26. Nakamura, Y., Nishi, T., Noguchi, R., Ito, Y., Watanabe, T., Nishiyama, T., et al.  
455 Construction of a new stable, autonomously replicating plasmid vector containing  
456 *Pichia pastoris* centromeric DNA. Appl. Environ. Microbiol. 2018;84(15). doi:  
457 10.1128/AEM.02882-17
- 458 27. Hieter, P., Mann, C., Snyder, M., Davis, R. W. Mitotic stability of yeast  
459 chromosomes : a colony color assay that measures nondisjunction and chromosome  
460 loss. Cell 1985;40(2): 381–392.
- 461 28. Ugolini, S., Bruschi, C. V. The red/white colony color assay in the yeast  
462 *Saccharomyces cerevisiae*: epistatic growth advantage of white *ade8-18*, *ade2* cells over  
463 red *ade2* cells. Curr. Genet. 1996;30(6): 485–492.
- 464 29. Du, M., Battles, M. B., Nett, J. H. A color-based stable multi-copy integrant  
465 selection system for *Pichia pastoris* using the attenuated *ADE1* and *ADE2* genes as  
466 auxotrophic markers. Bioeng. Bugs 2012;3(1): 32–37.
- 467 30. Piva, L. C., De Marco, J. L., de Moraes, L. M. P., Reis, V. C. B., Torres, F. A. G.  
468 Acetamidase as a dominant recyclable marker for *Komagataella phaffii* strain  
469 engineering. Appl. Microbiol. Biotechnol. 2018;102(6): 2753–2761.
- 470 31. Rébora, K., Laloo, B., Daignan-Fornier, B. Revisiting purine-histidine cross-  
471 pathway regulation in *Saccharomyces cerevisiae*: a central role for a small molecule.

- 472 Genetics 2005;170(1): 61–70.
- 473 32. Steensels, J., Snoek, T., Meersman, E., Nicolino, M. P., Voordeckers, K.,  
474 Verstrepen, K. J. Improving industrial yeast strains: exploiting natural and artificial  
475 diversity. FEMS Microbiol. Rev. 2014;38(5): 947–995.
- 476 33. Sambrook, J., Fritsch, E., Maniatis, T. Molecular cloning: a laboratory manual. 2nd  
477 ed. New York: Cold Spring Harbor Laboratory Press; 1989.
- 478 34. Wu, S., Letchworth, G. J. High efficiency transformation by electroporation of  
479 *Pichia pastoris* pretreated with lithium acetate and dithiothreitol. Biotechniques  
480 2004;36(1): 152–154.
- 481 35. Reis, V. C. B., Nicola, A. M., de Souza Oliveira Neto, O., Batista, V. D. F., de  
482 Moraes, L. M. P., Torres, F. A. G. Genetic characterization and construction of an  
483 auxotrophic strain of *Saccharomyces cerevisiae* JP1, a Brazilian industrial yeast strain  
484 for bioethanol production. J. Ind. Microbiol. Biotechnol. 2012;39(11): 1673–1683.
- 485 36. Betancur, M. O., Reis, V. C. B., Nicola, A. M., De Marco, J. L., de Moraes, L. M.  
486 P., Torres, F. A. G. Multicopy plasmid integration in *Komagataella phaffii* mediated by  
487 a defective auxotrophic marker. Microb. Cell Fact. 2017;16(99). doi: 10.1186/s12934-  
488 017-0715-8
- 489 37. Karim, A. S., Curran, K. A., Alper, H. S. Characterization of plasmid burden and  
490 copy number in *Saccharomyces cerevisiae* for optimization of metabolic engineering  
491 applications. FEMS Yeast Res. 2013;13(1): 107-116

492

493

## 494 Supporting information captions

495 **S1 Fig. Restriction analysis of recovered plasmids pPICH-CEN1, 2, and 4.** Plasmids

496 were digested with *NotI* and analyzed on 1% agarose gel. All digested plasmids yielded  
497 a common 4.1 kb band which represents the *ADE3* gene. The size of the upper bands  
498 represent the sum of individual centromeres (CEN1 = 7.6 kb; CEN2 = 9.0 kb; CEN4 =  
499 8.7 kb) and other common vector sequences. M: 1 kb Plus DNA Ladder (Thermo  
500 Fischer Scientific).



X-33

LA2

LA3

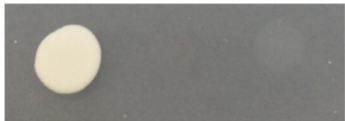

MD

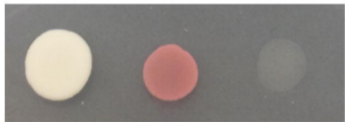

MD  
+Adenine

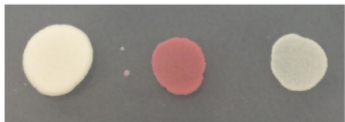

MD  
+Adenine  
+Histidine

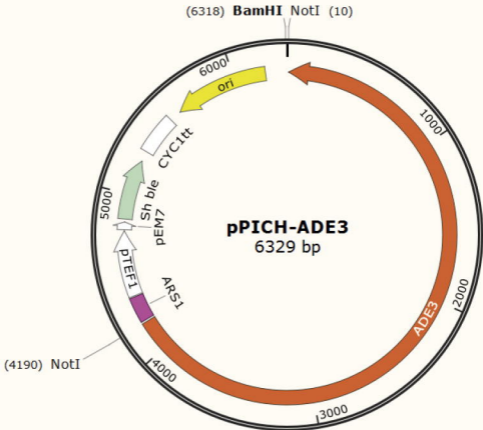

Cen1/2/3/4-F

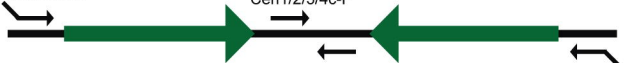

Cen1/2/3/4c-F

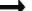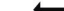

Cen1/2/3/4c-R

Cen1/2/3/4-R

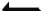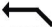

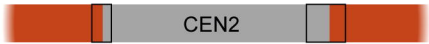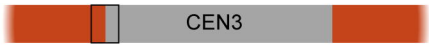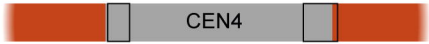

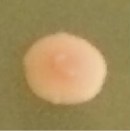

**pPICH-CEN1**

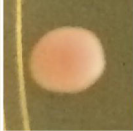

**pPICH-CEN2**

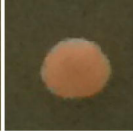

**pPICH-CEN4**

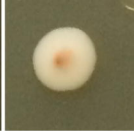

**pPICH-ADE3**

**A**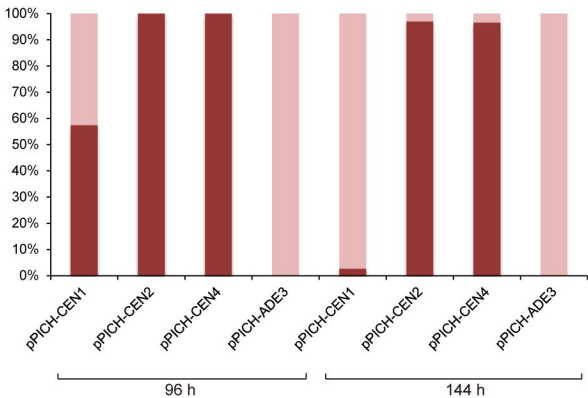**B**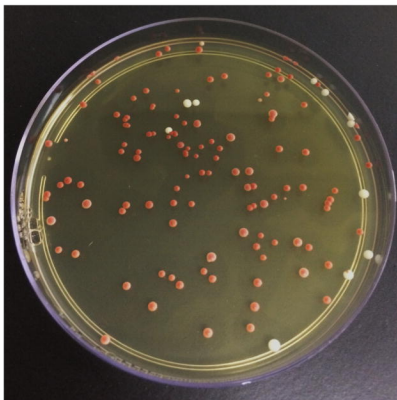

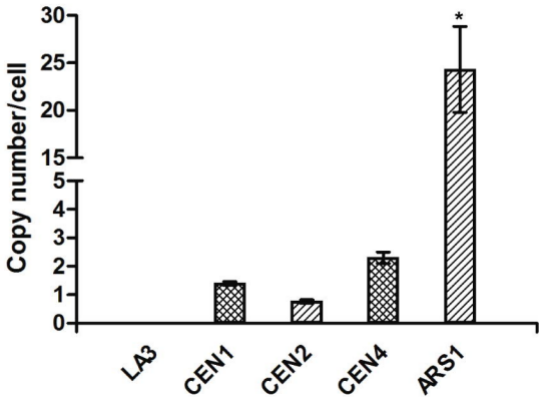

Source: https://www.biorxiv.org/content/10.1101/433417v3.full.pdf
